# Supplementary material for: Diatomite Photonic Crystals for Facile On-Chip Chromatography and Sensing of Harmful Ingredients from Food
Source: MDPI journal article supplement (doi:10.3390/ma11040539), 2018-03-31
Supplement: s1 [file s1]

Supplementary

# Diatomite Photonic Crystals for Facile On-Chip Chromatography and Sensing of Harmful Ingredients from Food

Xianming Kong <sup>1</sup>, Qian Yu <sup>1,\*</sup>, Erwen Li <sup>2</sup>, Rui Wang <sup>1</sup>, Qing Liu <sup>3</sup> and Alan Wang <sup>2,\*</sup>

<sup>1</sup> College of Chemistry, Chemical Engineering and Environment Engineering, Liaoning Shihua University, Fushun 113001, Liaoning, China; xmkong@lnpu.edu.cn (X.K.); rwang@lnpu.edu.cn (R.W.)

<sup>2</sup> School of Electrical Engineering and Computer Science, Oregon State University, Corvallis, OR 97331, USA; lie@oregonstate.edu

<sup>3</sup> Key Laboratory of Low Carbon Energy and Chemical Engineering, College of Chemical and Environmental Engineering, Shandong University of Science and Technology, Qingdao 266590, Shandong, China; qliu@sdust.edu.cn

\* Correspondence: qyu@lnpu.edu.cn (Q.Y.); wang@eecs.oregonstate.edu (A.W.); Tel.: +1-541-737-4247 (A.W.)

Received: 6 March 2018; Accepted: 29 March 2018; Published: 31 March 2018

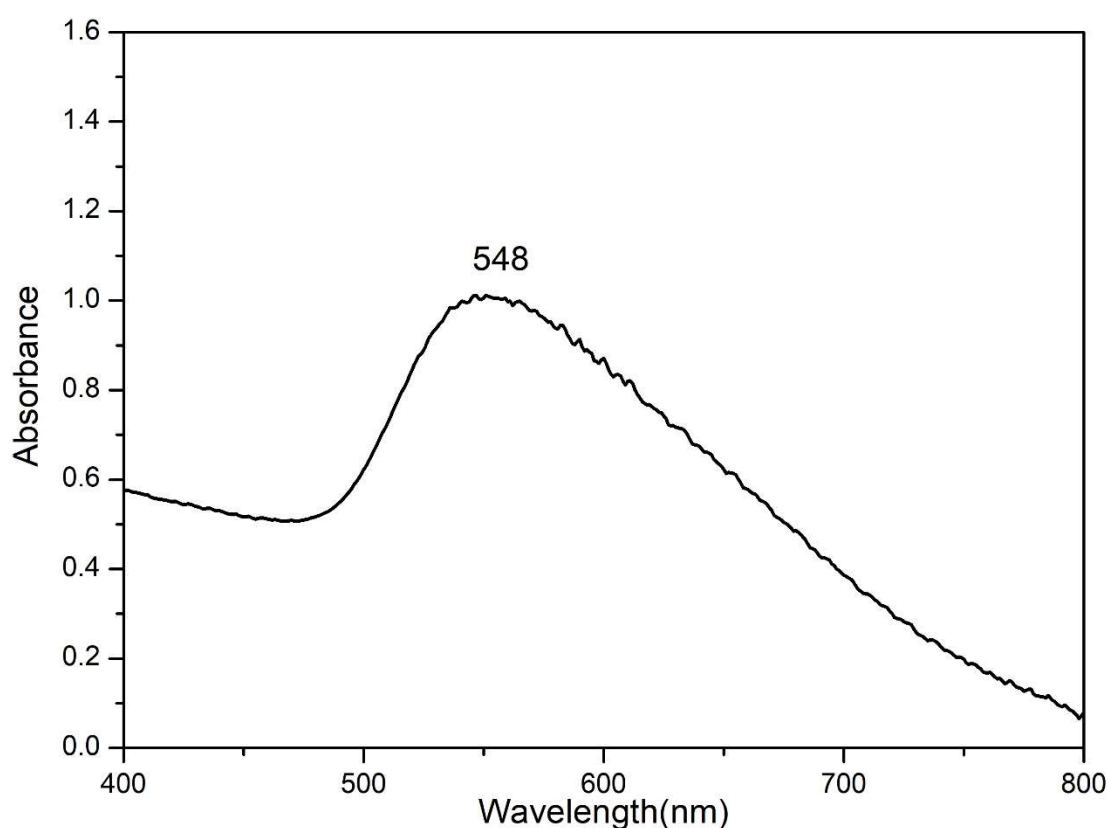

**Figure S1.** The UV-VIS absorption spectrum of the prepared Au colloids.

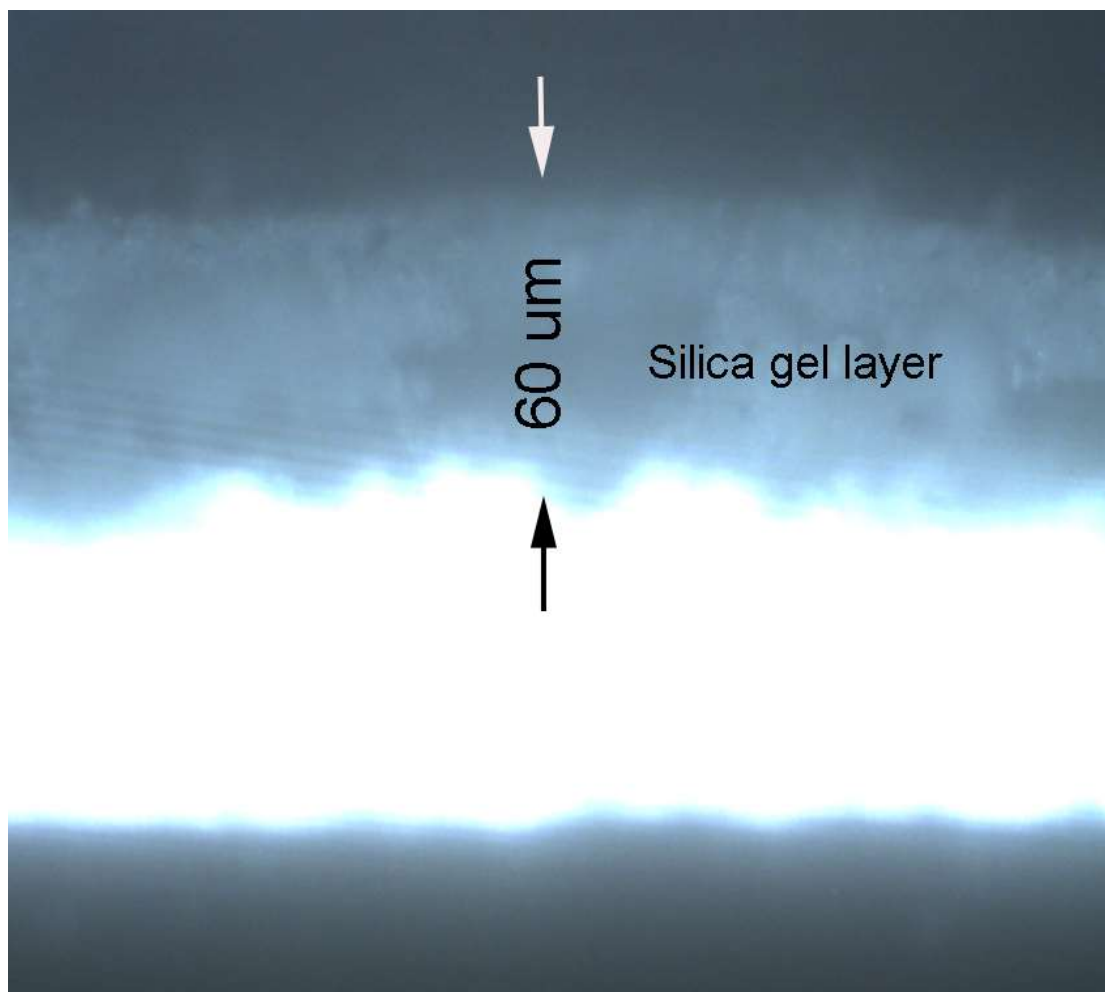

**Figure S2.** Microscopic image of the cross-section of the commercial silica gel TLC chip.
